# Supplementary material
Source: HighWire-hosted journal article supplement (https://tobaccocontrol.bmj.com/content/31/1/112)
Supplement: inline-supplementary-material-1 [file inline-supplementary-material-1.pdf]

**Supplementary Table 1:** Comparison of demographic characteristics of STOP participants with the 2014 Global Adult Tobacco survey, Pakistan

|                           | STOP survey (n=6014) |               |             | GATS 2014-daily smokers (n=108) |               |             | GATS 2014-all smokers (n=177) |               |             |
|---------------------------|----------------------|---------------|-------------|---------------------------------|---------------|-------------|-------------------------------|---------------|-------------|
|                           | n                    | (%unweighted) | (%weighted) | n                               | (%unweighted) | (%weighted) | n                             | (%unweighted) | (%weighted) |
| <b>Age</b>                |                      |               |             |                                 |               |             |                               |               |             |
| ≤35 years                 | 1842                 | 30.6%         | 29.7%       | 23                              | 21.3%         | 22.4%       | 51                            | 28.8%         | 36.3%       |
| >35 years                 | 4172                 | 69.4%         | 70.2%       | 85                              | 78.7%         | 77.6%       | 126                           | 71.2%         | 63.7%       |
| <b>Gender</b>             |                      |               |             |                                 |               |             |                               |               |             |
| Male                      | 5926                 | 98.5%         | 98.7%       | 97                              | 89.8%         | 86.2%       | 157                           | 88.7%         | 86.6%       |
| Female                    | 88                   | 1.5%          | 1.3%        | 11                              | 10.2%         | 13.8%       | 20                            | 11.3%         | 13.4%       |
| <b>Level of education</b> |                      |               |             |                                 |               |             |                               |               |             |
| No formal education       | 2034                 | 33.8%         | 32.9%       | 44                              | 40.7%         | 43.2%       | 66                            | 37.3%         | 39.6%       |
| Primary or equivalent     | 1378                 | 22.9%         | 23.6%       | 19                              | 17.6%         | 13.4%       | 31                            | 17.5%         | 13.8%       |
| Secondary or equivalent   | 1537                 | 22.5%         | 25.1%       | 28                              | 25.9%         | 28.8%       | 43                            | 24.3%         | 27.7%       |
| High school or equivalent | 517                  | 8.6%          | 8.4%        | 8                               | 7.4%          | 8.3%        | 17                            | 9.6%          | 11.2%       |
| Graduation or above       | 543                  | 9.0%          | 9.9%        | 9                               | 8.4%          | 6.2%        | 20                            | 11.3%         | 7.7%        |
